# Supplementary material
Source: PubMed Central journal article supplement (PMC2605297)
Supplement: NIHMS72924-supplement-2.pdf [file NIHMS72924-supplement-2.pdf]

## Supplemental Data

### A Single Mammalian Mitochondrial

### Translation Initiation Factor

### Functionally Replaces Two Bacterial Factors

Rahul Gaur, Domenick Grasso, Partha P. Datta, P.D.V. Krishna, Gautam Das, Angela Spencer, Rajendra K. Agrawal, Linda Spremulli, and Umesh Varshney

#### SUPPLEMENTAL RESULTS

**Homology modeling of IF2<sub>mt</sub>:** A homology model of IF2<sub>mt</sub> (Fig. 7) shows an overall similarity with the X-ray crystallographic structure of *Methanobacterium thermoautotrophicum* aIF5B (Roll-Mecak et al., 2000). This model is also very similar to the model that was derived by docking a homology model of *E. coli* IF2 (Fig. 7A) into the cryo-EM map of the 70S-initiation factor complex (PDB ID 1ZO1; Allen et al., 2005). However, the IF2<sub>mt</sub> model revealed that the conserved 37 amino acid insertion in IF2<sub>mt</sub> forms a helix that projects out from the main body of the molecule. We fitted the IF2<sub>mt</sub> model into the density corresponding to IF2 within the cryo-EM map of the *E. coli* initiation complex (Fig. 7B), using structurally conserved domains between the bacterial IF2 and IF2<sub>mt</sub> (excluding the insertion domain) as the main guide. A rigid-body fitting orients the conserved 37 amino acid insertion of IF2<sub>mt</sub> toward the small (30S) ribosomal subunit (Fig. 7B), such that a portion of the insert would partially overlap with the IF1 molecule in an X-ray crystallographic structure of the *Thermus thermophilus* 30S-IF1 complex (Carter et al., 2001). However, the contact sites of IF1 and the insertion domain of IF2<sub>mt</sub> on the 30S subunit appear to be different. IF1 interacts with three of the 30S-subunit components, helix 18, and the tip of helix 44 of the 16S rRNA, and protein S12 (Carter et al., 2001), which are

located on the inter-subunit side, the side that faces with 50S subunit in the 70S ribosome. In the case of IF2<sub>mt</sub>, we find that the insertion sequence interacts only with S12. Helix 18 and helix 44 lie within ~7.5 Å and ~9.5 Å, respectively, from the position of the insert. Considering that the insertion domain is linked to the rest of the IF2<sub>mt</sub> molecule through unstructured flexible loops, the possibility of an interaction between IF2<sub>mt</sub> and rRNA helices 18 and 44 cannot be ruled out in the ribosome-bound state. Nevertheless, the observed partial overlap in our fittings of atomic models into the cryo-EM map suggests that the IF2<sub>mt</sub> insert can partially act as a structural complement of the bacterial IF1.

## **SUPPLEMENTAL EXPERIMENTAL PROCEDURES**

**Cloning the IF1 gene from *E. coli* and *M. tuberculosis*:** *E. coli infA* was amplified from *E. coli* HB101 genomic DNA by *Pfu* DNA polymerase using forward primer *EcoIF1-FP* and reverse primer *EcoIF1-RP* (Table 2) and cloned between the *NcoI* and *PstI* sites of pTrc99C using standard procedures (Sambrook et al., 1989). Similarly, *M. tuberculosis infA* was amplified from the *M. tuberculosis* H37Rv genome by *Pfu* DNA polymerase using the forward primer *MtuIF1-FP* and the reverse primer *MtuIF1-RP* and cloned into the *NcoI* and *KpnI* sites of pTrc99C.

**Generation of IF2 variants:** The plasmid pTrc-IF2<sub>mt</sub> comprises the predicted mature form of IF2<sub>mt</sub> (beginning at amino acid 78 which follows the mitochondrial localization signal) cloned from the original pET21c(+) (Spencer and Spremulli, 2005) into pTrc99C using the *NcoI* and *XbaI* sites. An alanine residue was incorporated at the N-terminus after the initial Met to maintain the sequence in-frame. The IF2<sub>mt</sub> was excised from pTrc-IF2<sub>mt</sub> using *NcoI* and *HindIII* and cloned into the same sites of pACDH to yield pACDH-IF2<sub>mt</sub>. The plasmid pACDH-*EcoIF2* harbors *EcoIF2*.

The chimeric constructs IF2<sub>mt</sub>Δ37 and *EcoIF2::37* were generated by PCR using *Pfu* DNA polymerase. For pACDH-IF2<sub>mt</sub>Δ37, the first round of PCR was done with pACDH-*EcoIF2* as a template and a forward (IF2<sub>mt</sub>Del-FP) and reverse primer (IF2<sub>mt</sub>Del-RP). This PCR generated a ~130 bp megaprimer that was used for an inverse PCR with pTrcIF2<sub>mt</sub> as a template. The StuI-HindIII fragment from the resulting plasmid contained the chimeric region and was moved into StuI-HindIII sites of pACDH-IF2<sub>mt</sub> to generate pACDH-IF2<sub>mt</sub>Δ37. The construct *EcoIF2::37* was generated by a similar approach. PCR using a forward primer (*EcoIF2*Del-FP) and a reverse primer (*EcoIF2*Del-RP) with pET21-IF2<sub>mt</sub> as a template generated a PCR product that introduced silent mutations resulting in PmlI and BamHI restriction sites at the 5' and 3' ends of the primer, respectively. The pET21-*EcoIF2* gene was also doubly mutated using *EcoIF2*PmlI-FP/RP and *EcoIF2*BamHI-FP/RP to create PmlI and BamHI silent restriction sites and the PCR product was subsequently digested and ligated into the gene to yield pET21 *EcoIF2::37*. The *EcoIF2::37* insert was subcloned into NcoI-HindIII sites of pACDH to yield pACDH*EcoIF2::37*. The chimeric nature of the constructs was confirmed by DNA sequencing.

**Generation and analysis of gene knockouts in *E. coli* TG1:** Gene knockouts were generated in *E. coli* TG1 as described by Datsenko and Wanner, 2000 using a one-step homologous recombination approach to create the deletions. To generate ΔIF2, the *infB* gene was replaced with *Kan*<sup>R</sup>. *Pfu* DNA polymerase was used with forward (IF2-KO-FP) and reverse (IF2-KO-RP) primers (whose initial 36 nucleotides are homologous to 5' and 3' ends of *infB*, respectively; and the remaining sequences are complementary to the flanking regions of *Kan*<sup>R</sup> marker in pKD4) to amplify a *Kan*<sup>R</sup> cassette from pKD4. The PCR product was purified by gel elution (Bio101 GeneClean II™) and electroporated into *E. coli* TG1 harboring pKD46 (expresses λ Red recombinase) and pACDH-*EcoIF2*. The transformants were selected on kanamycin (25 μg/ml)

and the allelic exchange (*infB::Kan<sup>R</sup>*) was confirmed by PCR using indicated primers (Fig. 2). In the confirmed knockouts, pKD46 (Amp<sup>R</sup>) was cured by growth at 37 °C. To remove the genomic *Kan<sup>R</sup>*, pCP20 (Amp<sup>R</sup>) was transformed into the  $\Delta infB::Kan^R$  strain and the transformants were selected at 34 °C and further grown at 37 °C (Datsenko and Wanner, 2000). The plasmid pCP20 was cured during growth at 37 °C and the *E. coli*  $\Delta IF2$  strain thus generated was sensitive to kanamycin and ampicillin. This strain was used as the recipient to generate *E. coli*  $\Delta IF1\Delta IF2$ .

To generate  $\Delta IF1$ , the *infA* gene was replaced by a *Chl<sup>R</sup>* gene in *E. coli* DY330, a strain that harbors genes for  $\lambda$  Red recombinase in its genome (Lee et al., 2001). The *Chl<sup>R</sup>* gene was amplified from the pKD3 template by *Pfu* DNA polymerase with forward (IF1-KO-FP) and reverse (IF1-KO-RP) primers whose initial 36 nucleotides are homologous to 5' and 3' ends of *infA*, respectively and the remaining sequences are complementary to the flanking sequences of *Chl<sup>R</sup>* marker in pKD3. The PCR product was purified by gel elution (Bio101 GeneClean II™) and electroporated into *E. coli* DY330 harboring pTrc-*MtuIF1*, followed by recovery in 1 ml LB broth at 30 °C for 10 h. The cells were plated on LB agar containing chloramphenicol (30  $\mu$ g/ml), with or without 1 mM IPTG and incubated at 30 °C. After two days of incubation, the plates were shifted to 37 °C and the colonies obtained after a day were analyzed by PCR using upstream (*EcoIF1up-FP*) and downstream (*EcoIF1dn-RP*) primers (Fig. 4).

To generate *E. coli*  $\Delta IF1\Delta IF2$ , P1 phage raised on *E. coli* DY330  $\Delta infA::Chl^R$  + pTrc-*MtuIF1* was used to deliver the *infA::Chl<sup>R</sup>* locus into *E. coli*  $\Delta IF2$  harboring pACDH-*IF2<sub>mt</sub>*. The recipient strain did not contain *infB* or *Kan<sup>R</sup>* as the *Kan<sup>R</sup>* marker originally used to disrupt *infB* was removed by introducing pCP20 (mentioned above). Thus, the resulting *E. coli*  $\Delta IF1\Delta IF2$  strain is resistant to chloramphenicol and tetracycline (5  $\mu$ g ml<sup>-1</sup>) but sensitive to Kan.

**Genomic and RT-PCR for *infA*:** To analyse for replacement of *infA*, the flanking upstream (*EcoIF1up-FP*) and downstream (*EcoIF1dn-RP*) primers were used. To amplify a 160 bp region of *infA* ORF, internal forward (*IF1-RT-FP*) and reverse (*IF1-RT-RP*) primers were used along with Taq DNA polymerase and the genomic DNA (~100 ng) of various strains as template. For detection of *infA* mRNA, total RNA from various strains was prepared using hot-phenol method (Sarmientos et al 1983), and treated with RNase free DNaseI. Reverse transcriptase-PCR was carried out using iScript<sup>TM</sup> one step RT-PCR kit (BioRad). Briefly, total RNA (200 ng) was used to make cDNA against *IF1* mRNA to serve as template for PCR using forward (*IF1-RT-FP*) and reverse (*IF1-RT-RP*) primers. The PCR involved synthesis of DNA template at 50 °C for 10 min followed by heat inactivation of the reverse transcriptase at 95 °C for 10 min which also activated the hot start Taq DNA polymerase. To spike the DNA/RNA preparations, 50 ng DNA or 50 ng total RNA from the wild type strain was used. In both the genomic and RT-PCR reactions, as an internal control, for ORF specific primers for *ung* (*EcoungSeq-FP* and *Ecoung-RT-RP*) were also included to amplify a 137 bp fragment. The PCR products were analyzed by 8% PAGE using TBE buffer system and visualized by ethidium bromide staining (Sambrook et al., 1989).

***In vitro* assay of IF2 activity:** The activity of the factors in initiation complex formation was tested in reaction mixtures (0.1 ml) that contained 50 mM Tris-HCl (pH 7.8), 5 mM MgCl<sub>2</sub>, 80 mM KCl, 0.25 mM GTP, 1.25 mM phospho(enol)pyruvate, 0.1 unit pyruvate kinase, 1 mM dithiothreitol (DTT), 12.5 µg poly(A,U,G), 0.06 µM (6 pmol) [<sup>35</sup>S]fMet-tRNA<sup>fMet</sup> (approximately 70,000 cpm/pmol), 0.2 µM *E. coli* initiation factor 3 (IF3), 0.23 µM *E. coli* 70S ribosomes and the indicated amounts of IF1 and of the various IF2s. Samples were incubated at 37 °C for 15 min. After incubation, each sample was rapidly diluted with 3-4 ml of cold Buffer

Wash (50 mM Tris-HCl (pH 7.8), 5 mM MgCl<sub>2</sub>, 80 mM KCl) and filtered through a nitrocellulose membrane (Millipore Corporation) that had been wetted with cold Buffer Wash. The filters were washed with the 3 aliquots (3-4 ml each) of cold Buffer Wash. Filters were dried for 5-7 min at 100 °C and counted in 5 ml toluene containing 5 g/l 2, 4 diphenyloxazole (PPO) scintillation cocktail. A blank representing the amount of [<sup>35</sup>S]fMet-tRNA<sup>fMet</sup> retained on the filter in the absence of IF2 (0.05 pmol) has been subtracted from each value.

**Modeling of IF2<sub>mt</sub> on *E. coli* ribosomes/initiation complex:** Homology models of all IF2 sequences were obtained from the SWISS MODEL server (<http://swissmodel.expasy.org/>; Schwede *et al.*, 2003), using the X-ray crystallographic structure of *Methanobacterium thermoautotrophicum* aIF5B (Roll-Mecak *et al.*, 2000) as a template structure. Atomic structure of the *Thermus thermophilus* 30S-IF1 complex (Carter *et al.*, 2001; PDB ID 1HRO) was fitted into the small ribosomal subunit portion of the cryo-EM map of *E. coli* 70S-initiation complex (Allen *et al.*, 2005; EMD ID 3523) using the 30S structure as the main guide. The molecular modeling package, O (Jones *et al.*, 1991) was used for dockings. Visualization of the atomic structures and the cryo-EM density maps was done with Ribbons (Carson, 1991) and IRIS EXPLORER (Numerical Algorithms group, Inc. Downers Grove, IL), respectively.

**Table S1.** List of strains and plasmids used in this study.

| <i>E. coli</i> strains       | Relevant genotype/features                                                                                                    | Reference                        |
|------------------------------|-------------------------------------------------------------------------------------------------------------------------------|----------------------------------|
| ΔIF1                         | <i>ΔinfA::Chl<sup>R</sup></i>                                                                                                 | This study                       |
| ΔIF1ΔIF2                     | <i>ΔinfA::Chl<sup>R</sup> ΔinfB</i>                                                                                           | This study                       |
| ΔIF2                         | <i>ΔinfB::Kan<sup>R</sup></i> , the <i>Kan<sup>R</sup></i> was later removed from the genome                                  | This study                       |
| DY330                        | W3110 ΔlacU169 gal490 [lc1857Δ(cro-bioA)]                                                                                     | Lee et al., 2001                 |
| HB101                        | <i>supE44 hsdS20 (r<sub>B</sub><sup>-</sup> r<sub>B</sub><sup>-</sup>) recA13 ara-14 proA2 lacY1 galK2 rpsL20 xyl-5 mtl-1</i> | Boyer and Roulland-Dussoix, 1969 |
| TG1                          | <i>supE hsdΔ5 thi Δ(lac-proAB) F' [traD36 proAB<sup>+</sup> lacI<sup>a</sup> lacZΔM15]</i>                                    | Sambrook et al., 1989            |
| <b>Plasmids</b>              |                                                                                                                               |                                  |
| pACDH                        | Tet <sup>R</sup> , a medium copy number vector with pACYC origin of replication, compatible with ColE1 origin of replication  | Mangroo and RajBhandary, 1995    |
| pACDH- <i>EcoIF2</i>         | pACDH harboring <i>EcoIF2</i>                                                                                                 | This study                       |
| pACDH- <i>EcoIF2</i> ::37    | <i>EcoIF2</i> containing the conserved 37 amino acid insert from IF2 <sub>mt</sub>                                            | This study                       |
| pACDH-IF2 <sub>mt</sub>      | IF2 <sub>mt</sub> cloned into NcoI and HindIII sites of pACDH                                                                 | This study                       |
| pACDH-IF2 <sub>mt</sub> Δ37  | IF2 <sub>mt</sub> lacking the conserved 37 amino acid insertion                                                               | This study                       |
| pCP20                        | Amp <sup>R</sup> , expresses FLP recombinase, temperature sensitive replicon                                                  | Datsenko and Wanner, 2000        |
| pET21- <i>EcoIF2</i>         | <i>EcoIF2</i> cloned between NdeI and NotI sites                                                                              | This study                       |
| pET21- <i>EcoIF2</i> ::37    | <i>EcoIF2</i> containing the conserved 37 amino acid insert from IF2 <sub>mt</sub>                                            | This study                       |
| pET21-IF2 <sub>mt</sub>      | IF2 <sub>mt</sub> cloned into NdeI and XhoI sites of pET21c                                                                   | Spencer and Spremulli, 2005      |
| pET24b-IF2 <sub>mt</sub> Δ37 | IF2 <sub>mt</sub> lacking the conserved 37 amino acid insertion, cloned between NdeI and NcoI sites                           | This study                       |
| pKD3                         | Amp <sup>R</sup> , Chl <sup>R</sup> , <i>Chl<sup>R</sup></i> is flanked by FRT sequences                                      | Datsenko and Wanner, 2000        |
| pKD4                         | Amp <sup>R</sup> , Kan <sup>R</sup> , <i>Kan<sup>R</sup></i> is flanked by FRT sequences                                      | Datsenko and Wanner, 2000        |
| pKD46                        | Amp <sup>R</sup> , harbors λ Red recombination genes ( <i>γ</i> , <i>β</i> and <i>exo</i> ), temperature sensitive replicon.  | Datsenko and Wanner, 2000        |
| pTrc- <i>EcoIF1</i>          | <i>E. coli</i> IF1 cloned into NcoI and PstI sites of pTrc99C                                                                 | This study                       |
| pTrc-IF2 <sub>mt</sub>       | Predicted mature form of IF2 <sub>mt</sub> cloned between NcoI and HindIII sites                                              | This study                       |
| pTrc- <i>MtuIF1</i>          | <i>M. tuberculosis</i> IF1 cloned into NcoI and KpnI sites of pTrc99C                                                         | This study                       |

**Table S2.** List of oligonucleotides used in this study. The sequence is 5' to 3' from left to right. Restriction enzyme sites are denoted in italics.

|                          |                                                               |
|--------------------------|---------------------------------------------------------------|
| <i>Eco</i> IF1-FP        | GATTCCATGGCCAAAGAAGACA                                        |
| <i>Eco</i> IF1-RP        | CGCCCTGCAGGCGGTAAAACAA                                        |
| <i>Mtu</i> IF1-FP        | AAAGCCATGGCCAAGAAGGACG                                        |
| <i>Mtu</i> IF1-RP        | TGGGTACCTCGTTACTTGTACCGGT                                     |
| IF1-KO-FP                | GGTTCAAATTACGGTAGTGATACCCCAGAGGATTAGGTGT<br>AGGCTGGAGCTGCTTCG |
| IF1-KO-RP                | TCGTTCTTTCTCTTCGCCCATCAGGCGGTAAAACAACATA<br>TGAATATCCTCCTTA   |
| <i>Eco</i> IF1up-FP      | GGCGCTTCTGGTATTCTG                                            |
| <i>Eco</i> IF1dn-RP      | GAGTTCACCTGCCGTACAG                                           |
| IF1-RT-FP                | GACAATATTGAAATGCAAGG                                          |
| IF1-RT-RP                | GTCAGTTCAACAGTCACTTTG                                         |
| IF2-KO-FP                | GGTTCGGTGACGAAGCGTAATAAACTGTAGCAGGAGTGTA<br>GGCTGGAGCTGCTTCG  |
| IF2-KO-RP                | AGGTGGAAGGGCTGTTACGTTGACCTGATAAGACCATAT<br>GAATATCCTCCTTA     |
| IF2-FP5                  | GCAAGGCTTCCAGAAGCC                                            |
| <i>rbfA</i> -RP          | ACGGAATTCAGACAGAGAC                                           |
| IF2-FP3                  | GCTGAACGTGAGGCCGCA                                            |
| IF2-RP3                  | ACTTCGTCAGTAGACAGT                                            |
| IF2 <sub>mt</sub> -FP    | CATGCCATGGCCCAGAAATCTCCATTACCTTC                              |
| IF2 <sub>mt</sub> -RP    | CTAGTCTAGAATTATTAATAATCCTGGATCCCAAGAAG                        |
| IF2 <sub>mt</sub> Del-FP | CCAAGGGCACGTGAAGTTGCACTCTAT                                   |
| IF2 <sub>mt</sub> Del-RP | AAAATGGCTTCAACAGAACCCTGTACGTC                                 |
| <i>Eco</i> IF2Del-FP     | GAAGAAAGCACGTGAAGTTGTTGACTGGAGAAAGTATGAG                      |
| <i>Eco</i> IF2Del-RP     | CGCTTCGACGGATCCCTGAACATCACCTTTAACAATTACA                      |
| <i>Eco</i> EFG-FP        | ATGGCTCGTACAACACCCATC                                         |
| <i>Eco</i> EFG-RP        | GTATGGATCCTTAGGCTTATTTACC                                     |
| <i>Eco</i> IF2PmlI-FP    | CGTGACGAGAAGAAAGCACGTGAAGTTGCACTCTATCG                        |
| <i>Eco</i> IF2PmlI-RP    | CGATAGAGTGCAACTTCACGTGCTTTCTTCTCGTCACG                        |
| <i>Eco</i> IF2BamHI-FP   | GGCAGACGTACAGGGATCCGTCGAAGCGATCTCCG                           |
| <i>Eco</i> IF2BamHI-RP   | CGGAGATCGCTTCGACGGATCCCTGTACGTCTGCC                           |
| <i>Ecoung</i> RT-RP      | CTGGCATCCAGTCAATCGGC                                          |
| <i>Ecoung</i> Seq-FP     | AGCAACGCCATCATGTAC                                            |



## SUPPLEMENTAL REFERENCES

- Allen, G.S., and Frank, J. (2007). Structural insights on the translation initiation complex: ghosts of a universal initiation complex. *Mol. Microbiol.* *63*, 941-950.
- Boyer, H.W., and Roulland-Dussoix, D. (1969). A complementation analysis of the restriction and modification of DNA in *Escherichia coli*. *J. Mol. Biol.* *41*, 459-472.
- Carson, M. (1991). Ribbons 2.0, *J. Appl. Crystallogr.* *24*, 103–106.
- Carter, A.P., Clemons, W.M., Jr., Brodersen, D.E., Morgan-Warren, R.J., Hartsch, T., Wimberly, B.T., and Ramakrishnan, V. (2001). Crystal structure of an initiation factor bound to the 30S ribosomal subunit. *Science* *291*, 498-501.
- Datsenko, K.A., and Wanner, B.L. (2000). One-step inactivation of chromosomal genes in *Escherichia coli* K-12 using PCR products. *Proc. Natl. Acad. Sci. USA* *97*, 6640-6645.
- Jones, T.A., Zou, J.Y., Cowan, S.W., and Kjeldgaard, M. (1991). Improved methods for building protein models in electron density maps and the location of errors in these models, *Acta Crystallogr. A (Pt.2)* *47*, 110–119.
- Lee, E.C., Yu, D., Martinez de Velasco, J., Tessarollo, L., Swing, D.A., Court, D.L., Jenkins, N.A., and Copeland, N.G. (2001). A highly efficient *Escherichia coli*-based chromosome engineering system adapted for recombinogenic targeting and subcloning of BAC DNA. *Genomics* *73*, 56-65.
- Mangroo, D., and RajBhandary, U.L. (1995). Mutants of *Escherichia coli* initiator tRNA defective in initiation. Effects of overproduction of methionyl-tRNA transformylase and the initiation factors IF2 and IF3. *J. Biol. Chem.* *270*, 12203-12209.
- Roll-Mecak, A., Cao, C., Dever, T.E., and Burley, S.K. (2000). X-Ray structures of the universal translation initiation factor IF2/eIF5B: conformational changes on GDP and GTP binding. *Cell* *103*, 781-792.
- Sambrook, J.F., Fritsch, E.F., and Maniatis, T. (1989). *Molecular Cloning: A Laboratory Manual*. 2nd Edn. (Cold Spring Harbor, New York: Cold Spring Harbor Laboratory Press).

Sarmientos, P., Sylvester, J.E., Contente, S., and Cashel, M. (1983) Differential stringent control of the tandem *E. coli* ribosomal RNA promoters from the rRNA operon expressed *in vivo* in multi copy plasmids. *Cell* 32, 1337-1346

Schwede. T., Kopp, J., Guex, N., and Peitsch, M.C. (2003). SWISS-MODEL: an automated protein homology-modeling server. *Nucleic Acids Res.* 31, 3381-3385.

Spencer, A.C., and Spremulli, L.L. (2005). The interaction of mitochondrial translational initiation factor 2 with the small ribosomal subunit. *Biochim. Biophys. Acta* 1750, 69-81.
